# Supplementary material for: A Revised Phylogenetic Classification for Viola (Violaceae)
Source: MDPI journal article supplement (doi:10.3390/plants11172224), 2022-08-27
Supplement: s1 [file s1]

# Violets of the World

Thomas Marcussen, Harvey E. Ballard, Jiří Danihelka, Ana R. Flores, Marcela V. Nicola, John M. Watson

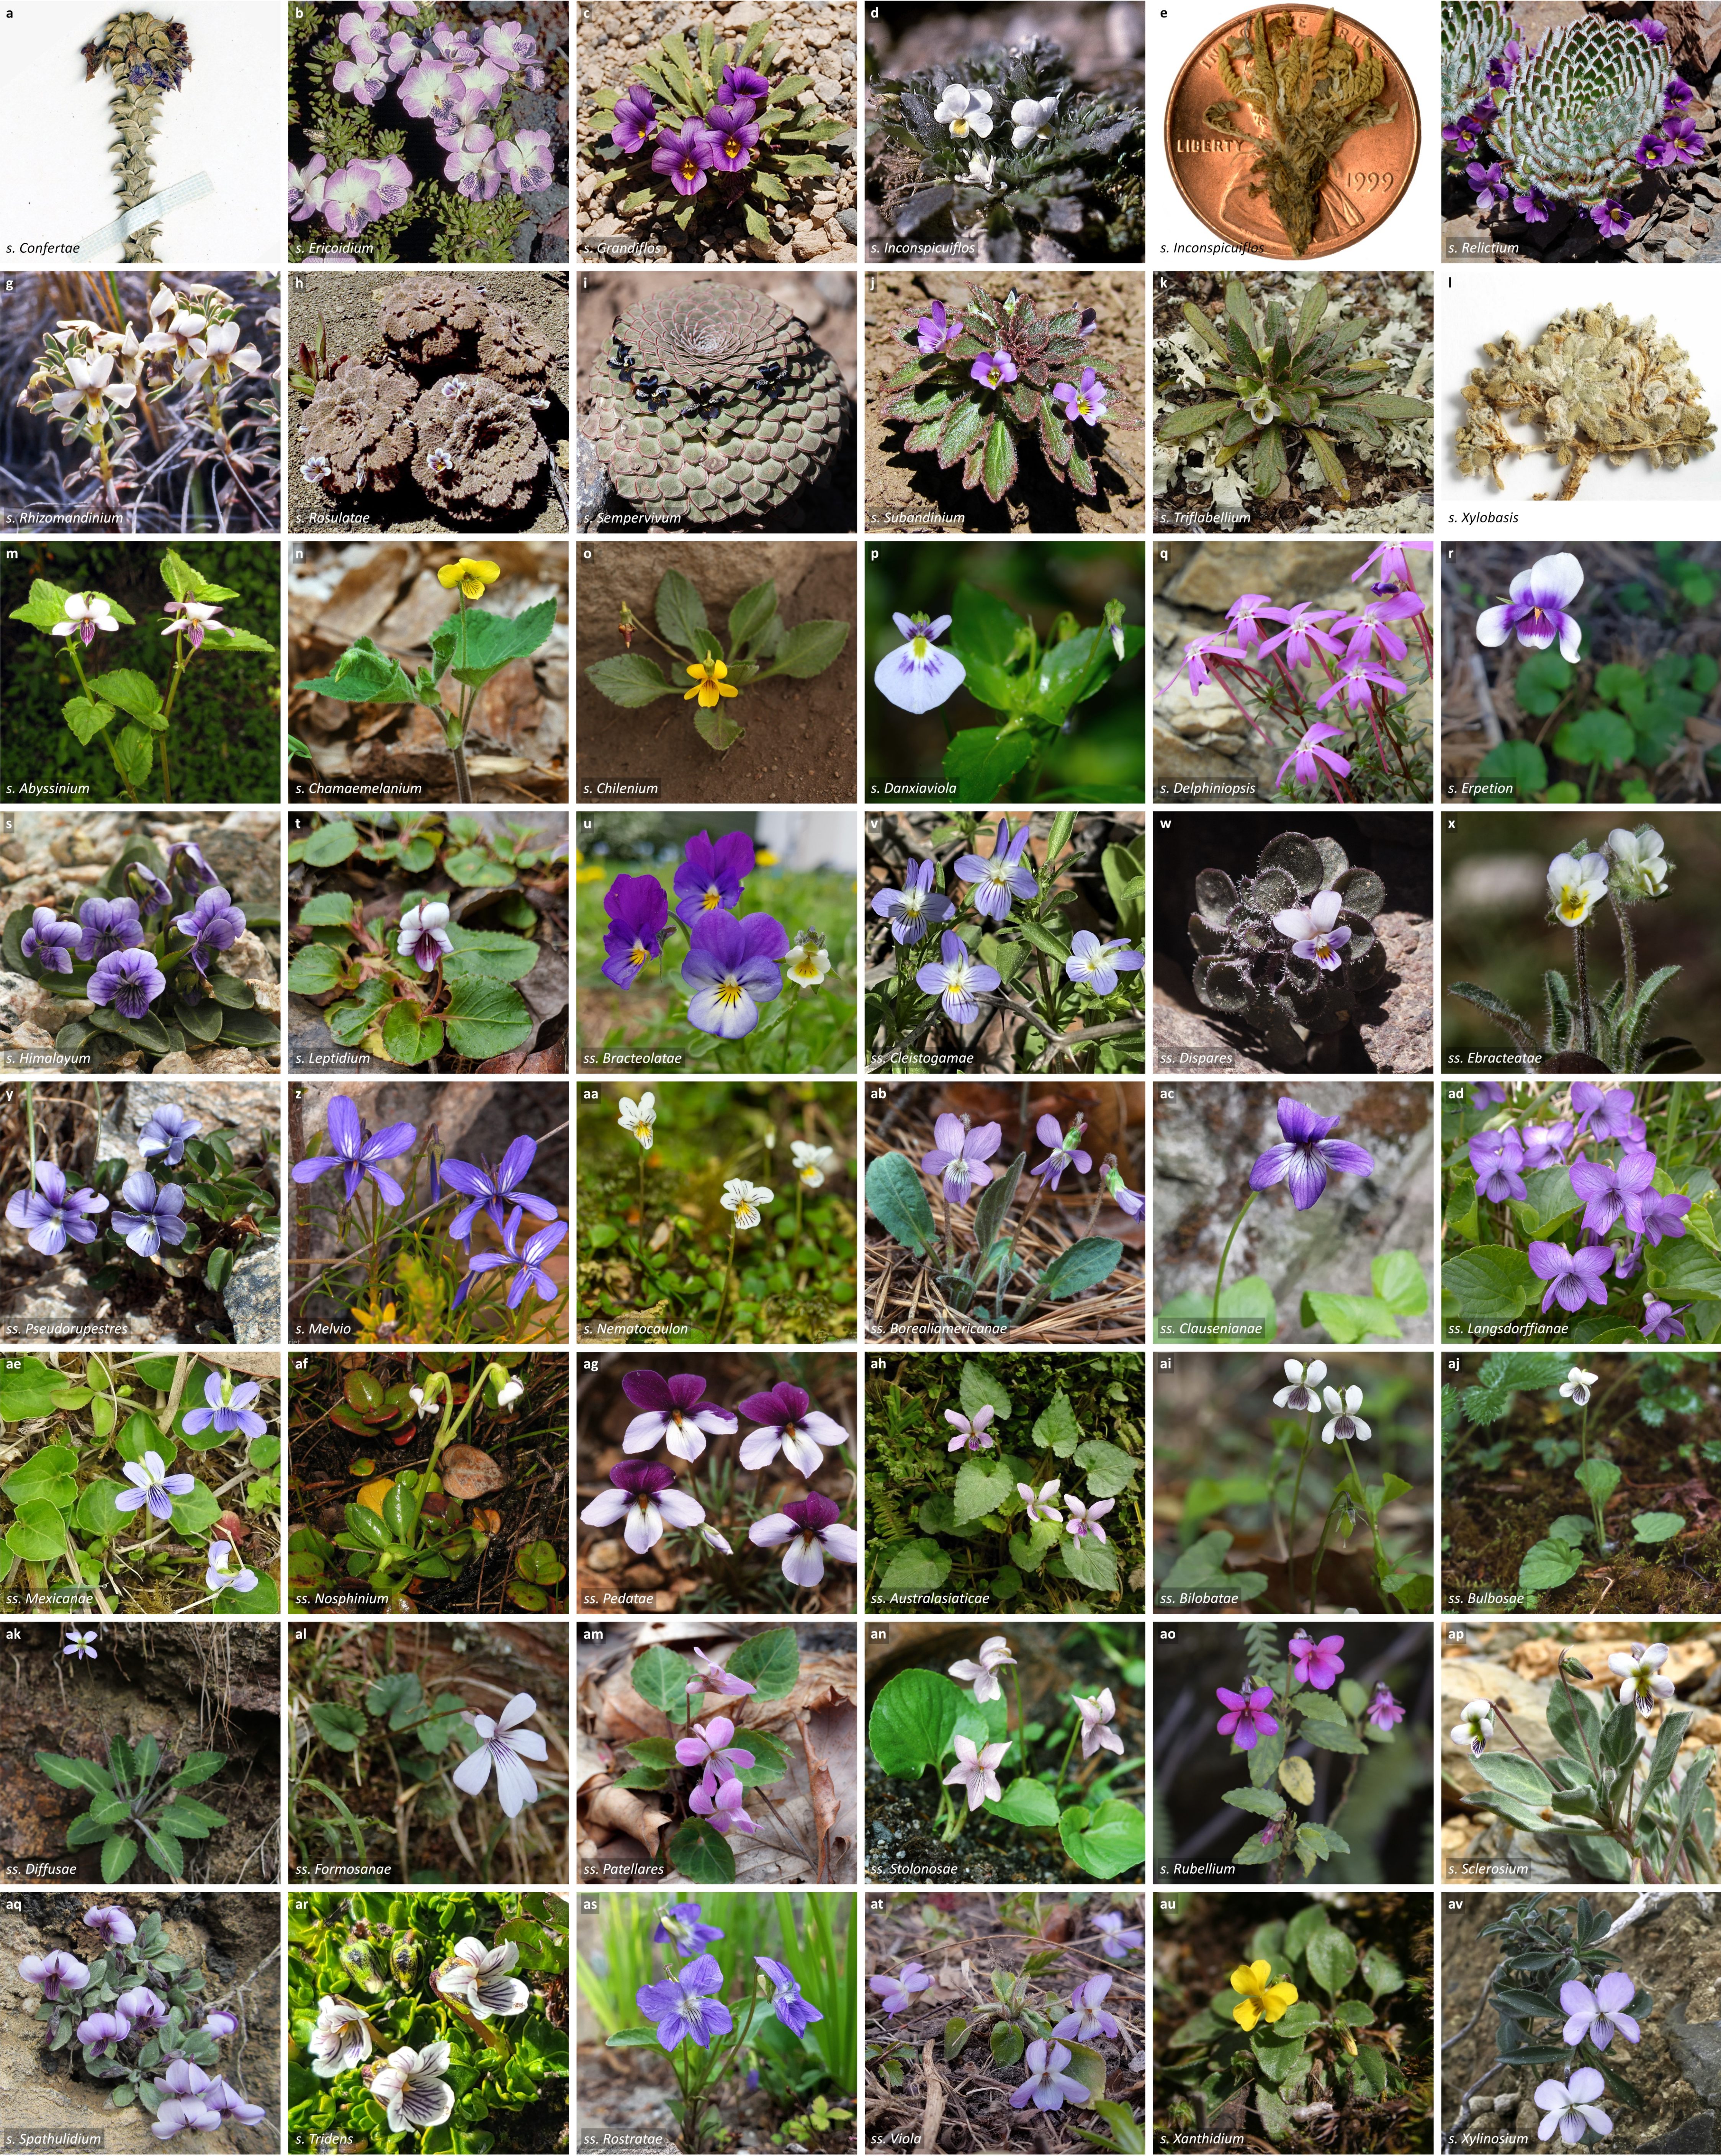

Photos of representative members of the sections and subsections of *Viola*. — a–i Subg. *Neandinium*. — m–av Subg. *Viola*. — a. Sect. *Confertae*: *V. nassauvioides*. — b. Sect. *Ericoidium*: *V. fuehmannii* (photo © John M. Watson). — c. Sect. *Grandiflos*: *V. cheesana* (photo © John M. Watson). — d. Sect. *Inconspicuos*: *V. weibelii* (photo © John M. Watson). — e. Sect. *Inconspicuos*: *V. illiputana* (photo © Harvey E. Ballard). — f. Sect. *Relictum*: *V. dandisiorum* (photo © John M. Watson). — g. Sect. *Rhizomandinium*: *V. escordidaensis* (photo © John M. Watson). — h. Sect. *Rosulatae*: *V. volcanica* (photo © Ana R. Flores). — i. Sect. *Sempervivum*: *V. atropurpurea* (photo © John M. Watson). — j. Sect. *Subandinium*: *V. subandina* (photo © Ana R. Flores). — k. Sect. *Triflabellium*: *V. triflabellata* (photo © Ana R. Flores). — l. Sect. *Xylobasis*: *V. beati* (photo © Ana R. Flores). — m. Sect. *Abyssinium*: *V. abyssinica* (photo © Robert V. Blittersdorff). — n. Sect. *Chamaemelanium*: *V. pubescens* (photo © Kim Blaxland). — o. Sect. *Chilenium*: *V. maculata* (photo © Instituto de Botánica Darwinion). — p. Sect. *Danxiaviola*: *V. hybanthoides* (photo © Qiang Fan). — q. Sect. *Delphiniopsis*: *V. cazorlensis* (photo © Santiago Martín-Bravo). — r. Sect. *Erpetion*: *V. banksii* (photo © Dewald du Plessis). — s. Sect. *Himalayum*: *V. kunawurensis* (photo © Vladimir Epikhetov). — t. Sect. *Leptidium*: *V. boliviana* (photo © Sam Wilson). — u. Sect. *Melanium*, subsection. *Bracteolatae*: *V. tricolor* and *V. arvensis* (photo © Thomas Marcussen). — v. Sect. *Melanium*, subsection. *Cleistogamae*: *V. rafinesquei* (photo © Mary Ann Yaich). — w. Sect. *Melanium*, subsection. *Dispaes*: *V. dyris* (photo © Alan Keohane). — x. Sect. *Melanium*, subsection. *Ebracteatae*: *V. parvula* (photo © Albert Keshet). — y. Sect. *Melanium*, subsection. *Pseudoruprestres*: *V. nummulariifolia* (photo © Sylvain Piry). — z. Sect. *Melvio*: *V. decumbens* (photo © Magriet Brink). — aa. Sect. *Nematocaulon*: *V. filicaulis* (photo © Andrew Townsend). — ab. Sect. *Nosphinium*, subsection. *Borealiamericanae*: *V. fimbriatula* (photo © Kim Blaxland). — ac. Sect. *Nosphinium*, subsection. *Clausenianae*: *V. clauseniana* (photo © Thomas Marcussen). — ad. Sect. *Nosphinium*, subsection. *Langsdorffianae*: *V. langsdorffii* (photo © Jonathan Goff). — ae. Sect. *Nosphinium*, subsection. *Mexicanae*: *V. nannei* (photo © Neptali Ramírez Marcial). — af. Sect. *Nosphinium*, subsection. *Nosphinium*: *V. maviensis* (photo © Karl Magnacca). — ag. Sect. *Nosphinium*, subsection. *Pedatae*: *V. pedata* (photo © Kim Blaxland). — ah. Sect. *Plagiostigma*, subsection. *Australasiaticae*: *V. sumatrana* (photo © Mario Duchon). — ai. Sect. *Plagiostigma*, subsection. *Bilobatae*: *V. hamiltoniana* (photo © Toshihiro Nagata). — aj. Sect. *Plagiostigma*, subsection. *Bulbosae*: *V. formosana* (photo © Kuan-Chieh (Chuck) Hung). — ak. Sect. *Plagiostigma*, subsection. *Patellares*: *V. tokubuchiana* (photo © Masashi Igari). — al. Sect. *Plagiostigma*, subsection. *Stolonosae*: *V. diffusa* (photo © Kim Blaxland). — am. Sect. *Rubellium*: *V. rubella* (photo © Pablo Silva). — an. Sect. *Rubellium*: *V. rubella* (photo © Pablo Silva). — ao. Sect. *Sclerosium*: *V. cinerea* (photo © Jerome Viard). — ap. Sect. *Sclerosium*: *V. cinerea* (photo © Jerome Viard). — aq. Sect. *Spathulidium*: *V. pachyrrhiza* (photo © Dieter Zschummel). — ar. Sect. *Tridens*: *V. tridentata* (photo © Iarsonek). — as. Sect. *Viola*, subsection. *Rostratae*: *V. canina* (photo © Thomas Marcussen). — at. Sect. *Viola*, subsection. *Viola*: *V. collina* (photo © Thomas Marcussen). — au. Sect. *Xanthidium*: *V. flavicans* (photo © Instituto de Botánica Darwinion). — av. Sect. *Xylinosium*: *V. arborescens* (photo © Abdelmonaim Homrani Bakali). — All images used in this figure were cropped and gamma-corrected. — Links to the online sources for the images used in this figure under a creative commons (CC) licence: *V. abyssinica*, [http://www.westafrikanplants.senckenberg.de/root/index.php?page\\_id=47&id=2203#image=22051](http://www.westafrikanplants.senckenberg.de/root/index.php?page_id=47&id=2203#image=22051), © Robert V. Blittersdorff; *V. arborescens*, <https://www.teline.fr/en/photos/violaceae/viola-arborescens#photo-7>, © Abdelmonaim Homrani Bakali, CC BY-NC 4.0; *V. nummulariifolia*, <https://www.inaturalist.org/observations/89240299>, © Sylvain Piry, CC BY-NC 4.0; *V. banksii*, <https://inaturalist.nz/observations/25048808>, © Dewald du Plessis, CC BY-NC 4.0; *V. boliviana*, <https://ecuador.inaturalist.org/photos/57308380>, © Sam Wilson, CC BY-NC; *V. cazorlensis*, <https://www.inaturalist.org/observations/109331467>, © Santiago Martín-Bravo, CC BY-NC 4.0; *V. cinerea*, <https://www.inaturalist.org/observations/65108391>, © Jerome Viard, CC BY-NC 4.0; *V. decumbens*, <https://www.inaturalist.org/observations/74528763>, © Toshihiro Nagata, CC BY-NC 4.0; *V. filicaulis*, <https://www.inaturalist.org/observations/73470330>, © Mary Ann Yaich, CC BY-NC 4.0; *V. formosana*, <https://www.inaturalist.org/observations/6527547>, © Neptali Ramírez Marcial, CC BY-NC; *V. rafinesquei*, <https://www.inaturalist.org/observations/111043498>, © Mary Ann Yaich, CC BY-NC 4.0; *V. rubella*, <https://www.inaturalist.org/observations/93725094>, © Pablo Silva, CC BY-NC 4.0; and *V. tridentata*, <https://www.inaturalist.org/observations/103467450>, © Iarsonek, CC BY-NC 4.0. — Links to the relevant CC licences: CC BY 4.0 (<https://creativecommons.org/licenses/by/4.0/>), CC-BY-NC and CC BY-NC 4.0 (<https://creativecommons.org/licenses/by-nc/4.0/>), CC BY-NC-SA 4.0 (<https://creativecommons.org/licenses/by-nc-sa/4.0/>).

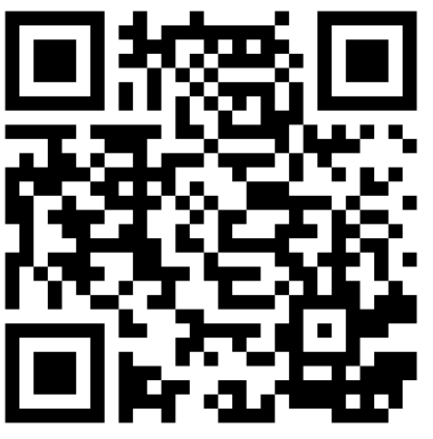

Marcussen et al. 2022. A revised phylogenetic classification for *Viola* (Violaceae). *Plants* 11(17) 2224. <https://www.mdpi.com/2223-7747/11/17/2224>
